# Supplementary material for: Social Network Sites as a Mode to Collect Health Data: A Systematic Review
Source: PubMed Central journal article supplement (PMC4397388; doi:10.2196/jmir.3050), 2014-07-14
Supplement: jmir_v16i7e171_app2.pdf [file jmir_v16i7e171_app2.pdf]

Table 2. Summary of included studies

| Reference | Study ID      | Title                                                                                                    | Objective of study                                                                                                                                                                                                     | Target population     | Data type    | Data collection tool | SNS                           | Related outcomes                                                                                                           |
|-----------|---------------|----------------------------------------------------------------------------------------------------------|------------------------------------------------------------------------------------------------------------------------------------------------------------------------------------------------------------------------|-----------------------|--------------|----------------------|-------------------------------|----------------------------------------------------------------------------------------------------------------------------|
| [11]      | Heather, 2009 | Social media and health: Social support and social capital on pregnancy-related social networking sites. | Whether participation on online social network related to health was associated with health outcomes.                                                                                                                  | Pregnant women >18    | Quantitative | Survey               | 8 SNS-pregnant health related | <ul style="list-style-type: none"> <li>• Strategy</li> <li>•Data quality</li> <li>•Limitations</li> </ul>                  |
| [12]      | Levine, 2011  | Formative research on MySpace: online methods to engage hard-to-reach populations.                       | Describe the process of conducting formative research on a popular social networking site, MySpace, in an effort to involve youth of color in design of programmatic content and formats for an Internet intervention. | Youth (16-24)         | Qualitative  | Focus group          | My Space                      | <ul style="list-style-type: none"> <li>•Strategy</li> <li>•Data quality</li> <li>•Strength</li> </ul>                      |
| [13]      | Woolley, 2012 | Efficacy of a health-related Facebook social network site on health-seeking behaviors.                   | Determine the impact of a health-related Facebook fan page on health-seeking actions, thoughts, and behaviors.                                                                                                         | >18                   | Quantitative | Survey               | Facebook                      | <ul style="list-style-type: none"> <li>•Strategy</li> <li>•Data quality</li> <li>•Limitation</li> </ul>                    |
| [14]      | Fenner, 2012  | Web-based recruiting for health research using a social networking site: An exploratory study.           | To assess the feasibility of recruiting young females using targeted advertising on the social networking site Facebook.                                                                                               | Females (16- 25)      | Quantitative | Survey               | Facebook                      | <ul style="list-style-type: none"> <li>•Strategy</li> <li>•Data quality</li> <li>•Strength</li> </ul>                      |
| [15]      | Ramo, 2012    | Broad reach and targeted recruitment using Facebook for an online survey of young adult substance use.   | Examined Facebook as a mechanism to reach and survey young adults about tobacco and other substance use.                                                                                                               | Young smokers (18-25) | Quantitative | Survey               | Facebook                      | <ul style="list-style-type: none"> <li>•Strategy</li> <li>•Data quality</li> <li>•Strength</li> <li>•Limitation</li> </ul> |

|      |                 |                                                                                                                                                         |                                                                                                                                                                                                                                                                                                           |                             |              |        |                        |                                                                                                                            |
|------|-----------------|---------------------------------------------------------------------------------------------------------------------------------------------------------|-----------------------------------------------------------------------------------------------------------------------------------------------------------------------------------------------------------------------------------------------------------------------------------------------------------|-----------------------------|--------------|--------|------------------------|----------------------------------------------------------------------------------------------------------------------------|
| [16] | Shindel, 2012   | An Internet survey of demographic and health factors associated with risk of sexual dysfunction in women who have sex with women (WSW).                 | To investigate the associations of high risk for sexual dysfunction in an Internet cohort of WSW.                                                                                                                                                                                                         | WSW >18                     | Quantitative | Survey | SNS for WSW + Facebook | <ul style="list-style-type: none"> <li>•Strength</li> <li>•Limitation</li> </ul>                                           |
| [17] | Strasser, 2012  | Feasibility study of social media to reduce intimate partner violence among men who have sex with men (MSM) in metro Atlanta, Georgia.                  | Examine the feasibility of enrolling 100 gay men from Atlanta into an Intimate Partner Violence survey study. The survey was administered via Facebook.                                                                                                                                                   | MSM                         | Quantitative | Survey | Facebook               | <ul style="list-style-type: none"> <li>•Strategy</li> <li>•Data quality</li> <li>•Strength</li> <li>•Limitation</li> </ul> |
| [18] | Lohse, 2013     | Facebook is an effective strategy to recruit low-income women to online nutrition education.                                                            | Examine Facebook as a strategy to recruit low-income women, within a specific age and geographic location, to participate in an online nutrition education program.                                                                                                                                       | Females (18-45)             | Quantitative | Survey | Facebook               | <ul style="list-style-type: none"> <li>•Strategy</li> <li>•Data quality</li> <li>•Strength</li> </ul>                      |
| [19] | Cucchetti, 2012 | The use of social networking to explore knowledge and attitudes toward organ donation in Italy.                                                         | Investigate issues regarding organ donation.                                                                                                                                                                                                                                                              | Community, no targeted age. | Quantitative | Survey | Facebook               | <ul style="list-style-type: none"> <li>•Strategy</li> <li>•Data quality</li> <li>•Strength</li> <li>•Limitation</li> </ul> |
| [20] | Lord, 2011      | Connecting to young adults: an online social network survey of beliefs and attitudes associated with prescription opioid misuse among college students. | (1) Assess the feasibility of implementing a survey study about prescription medication misuse with college students on Facebook<br>(2) Identify the characteristics, motivations, beliefs and attitudes associated with experimental versus regular misuse of prescription opioid analgesic medications. | young adults (18-25)        | Quantitative | Survey | Facebook               | <ul style="list-style-type: none"> <li>•Strategy</li> <li>•Data quality</li> <li>•Strength</li> <li>•Limitation</li> </ul> |
