# Supplementary material for: Social Network Sites as a Mode to Collect Health Data: A Systematic Review
Source: PubMed Central journal article supplement (PMC4397388; doi:10.2196/jmir.3050), 2014-07-14
Supplement: jmir_v16i7e171_app3.pdf [file jmir_v16i7e171_app3.pdf]

Table 3. Quality assessment of included studies.

| Reference | Study ID        | Indicator                      |                                     |                  |                          |                                    |                                                  |                                     |                     | Quality indicators met |
|-----------|-----------------|--------------------------------|-------------------------------------|------------------|--------------------------|------------------------------------|--------------------------------------------------|-------------------------------------|---------------------|------------------------|
|           |                 | 1.Appropriate research design? | 2.Appropriate recruitment strategy? | 3.Response rate? | 4.Sample representative? | 5.Objective and reliable measures? | 6.Power calculation or justification of numbers? | 7.Appropriate statistical analysis? | 8.Evidence of bias? |                        |
| [11]      | Heather, 2009   | 1                              | 1                                   | -                | 1                        | 1                                  | -                                                | 1                                   | -                   | 5/8                    |
| [12]      | Levine, 2011    | 1                              | 1                                   | 1                | -                        | 1                                  | -                                                | 1                                   | 1                   | 6/8                    |
| [13]      | Woolley, 2012   | 1                              | 1                                   | 1                | -                        | 1                                  | 1                                                | 1                                   | -                   | 6/8                    |
| [14]      | Fenner, 2012    | 1                              | 1                                   | 1                | 1                        | 1                                  | 1                                                | 1                                   | -                   | 6/8                    |
| [15]      | Ramo, 2012      | 1                              | 1                                   | 1                | 1                        | 1                                  | 1                                                | 1                                   | -                   | 7/8                    |
| [16]      | Shindel, 2012   | 1                              | 1                                   | -                | 1                        | 1                                  | 1                                                | 1                                   | 1                   | 6/8                    |
| [17]      | Strasser, 2012  | 1                              | 1                                   | -                | -                        | 1                                  | -                                                | 1                                   | -                   | 5/8                    |
| [18]      | Lohse, 2013     | 1                              | 1                                   | 1                | 1                        | 1                                  | 1                                                | 1                                   | -                   | 7/8                    |
| [19]      | Cucchetti, 2012 | 1                              | 1                                   | 1                | 1                        | 1                                  | 1                                                | 1                                   | -                   | 7/8                    |
| [20]      | Lord, 2011      | 1                              | 1                                   | 1                | 1                        | 1                                  | 1                                                | 1                                   | -                   | 7/8                    |
|           | Total           | 10/10                          | 10/10                               | 7/10             | 7/10                     | 10/10                              | 7/10                                             | 10/10                               | 2/10                | ----                   |
